# Supplementary material for: A Microperfusion and In-Bore Oxygenator System Designed for Magnetic Resonance Microscopy Studies on Living Tissue Explants
Source: PubMed Central journal article supplement (PMC4678305; doi:10.1038/srep18095), 2015-12-15
Supplement: srep18095-s1.pdf [file srep18095-s1.pdf]

## **A Microperfusion and In-Bore Oxygenator System Designed for Magnetic Resonance Microscopy Studies on Living Tissue Explants.**

Jeremy J. Flint<sup>1,2\*</sup>, Kannan Menon<sup>2,3</sup>, Brian Hansen<sup>4</sup>, John Forder<sup>5</sup>, Stephen J. Blackband<sup>1,2,6</sup>

<sup>1</sup> Department of Neuroscience, University of Florida, Gainesville, Florida, United States of America

<sup>2</sup> McKnight Brain Institute, University of Florida, Gainesville, Florida, United States of America

<sup>3</sup> Department of Biomedical Engineering, University of Florida, Gainesville, Florida, United States of America

<sup>4</sup> Center for Functionally Integrative Neuroscience, Aarhus University, Aarhus, Denmark

<sup>5</sup> Department of Radiology, University of Florida, Gainesville, Florida, United States of America

<sup>6</sup> National High Magnetic Field Laboratory, Florida State University, Tallahassee, Florida, United States of America

\* Corresponding author

E-mail: Dr. Jeremy Flint [jflint@mbi.ufl.edu](mailto:jflint@mbi.ufl.edu)

Mr. Kannan Menon [kannan.menon89@ufl.edu](mailto:kannan.menon89@ufl.edu)

Dr. Brian Hansen [brian@cfin.au.dk](mailto:brian@cfin.au.dk)

Dr. John Forder [jforder@ufl.com](mailto:jforder@ufl.com)

Dr. Stephen Blackband [sblackba@ufl.edu](mailto:sblackba@ufl.edu)

Background ROI placement in images

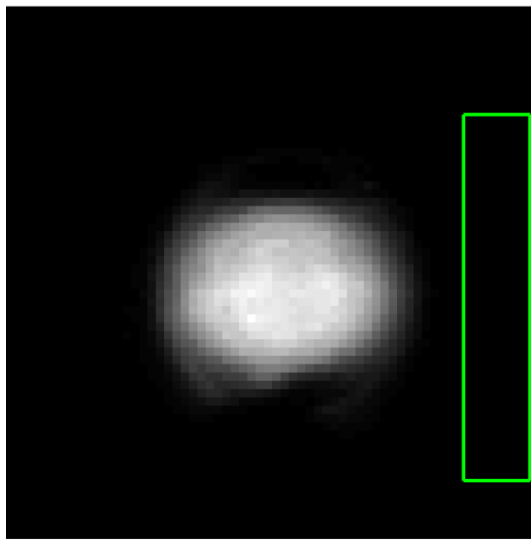

a

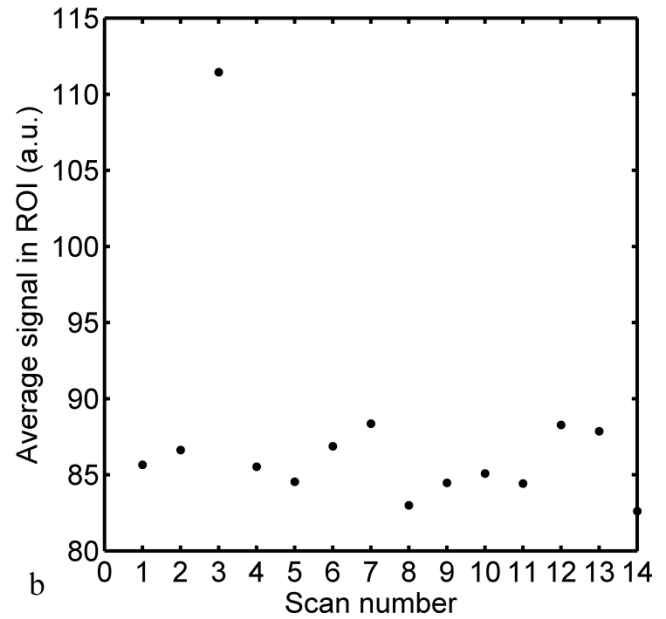

b

**Figure S1. Increased noise readings in the 4.5 h time point (scan 3) of fixed slice stability experiment (1 of 3 trials).** (a) Representative diffusion image showing the noise ROI (  ) calculated for each of 14 scans in the 21 h series. (b) Signal intensity graph of the noise region measured at each time point. Note the sharp increase in noise observed during the third scan.

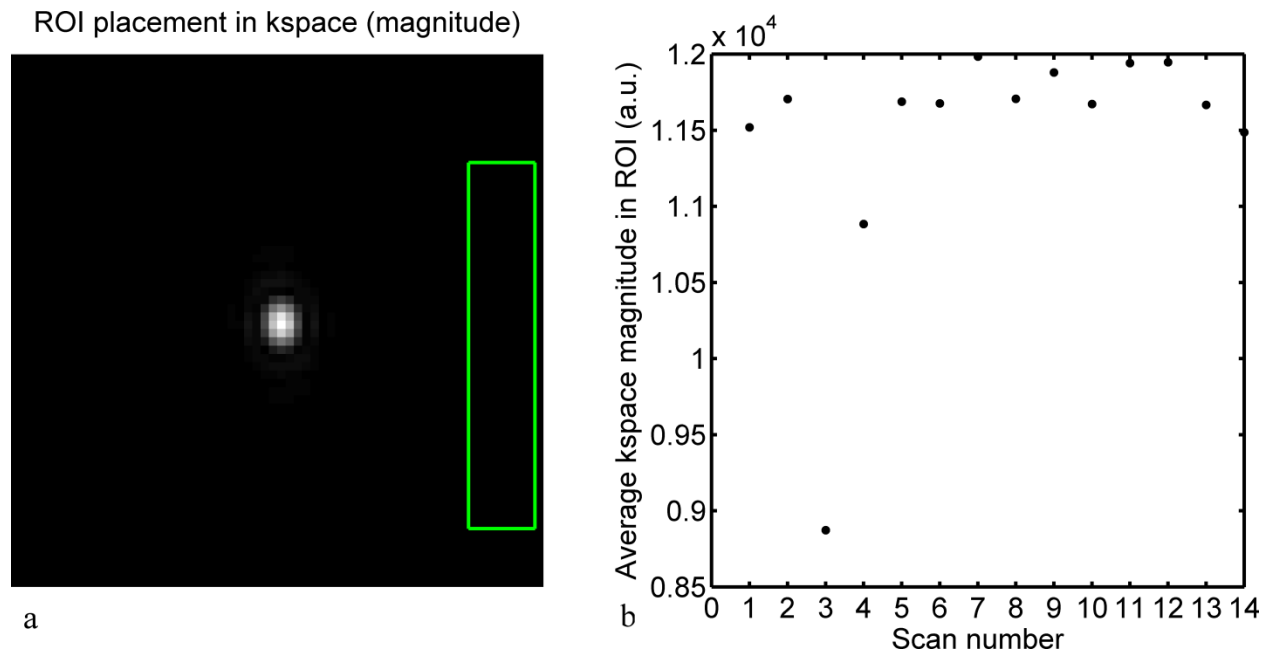

**Figure S2. Decreased k-space intensity in the 4.5 h and 6.0 h time points (scans 3 and 4) of fixed slice stability experiment (1 of 3 trials).** (a) Representative k-space image showing the ROI (  ) calculated for each of 14 scans in the 21 h series. (b) Signal intensity graph of the ROI measured at each time point. Note the sharp decrease in magnitude observed during the third and persisting into the fourth scans.
